# Supplementary material for: Upgrading biogenic furans: blended C10–C12 platform chemicals via lyase-catalyzed carboligations and formation of novel C12 – choline chloride-based deep-eutectic-solvents
Source: Royal Society of Chemistry journal article supplement (doi:10.1039/c5gc00342c), 2015-01-01
Supplement: c5gc00342c1.pdf [file c5gc00342c1.pdf]

**Upgrading Biogenic Furans: Blended C<sub>10</sub>-C<sub>12</sub> Platform Chemicals via Lyase-Catalyzed  
Carboligations and Formation of Novel C<sub>12</sub> – Choline Chloride-Based Deep-Eutectic-  
Solvents.\*\***

Joseph Donnelly<sup>a,b</sup>, Christoph R. Müller<sup>a</sup>, Lotte Wiermans<sup>a</sup>, Christopher J. Chuck<sup>c\*</sup>, Pablo  
Domínguez de María<sup>a,d\*\*</sup>

**SUPPLEMENTARY INFORMATION**

<sup>a</sup>: Institut für Technische und Makromolekulare Chemie (ITMC),  
RWTH Aachen University. Worringerweg 1. 52074 Aachen, Germany.

<sup>b</sup>: Doctoral Training Centre in Sustainable Chemical Technologies, Dept. of Chemical  
Engineering, University of Bath, Bath, UK BA2 7AY

<sup>c</sup> Centre for Sustainable Chemical Technologies, Dept. of Chemical Engineering, University  
of Bath, Bath, UK BA2 7AY

<sup>d</sup> Present address: Sustainable Momentum, SL Ap. Correos 3517. 35004, Las Palmas de Gran  
Canaria, Canary Islands, Spain.

## Analysis of products.

*NMR-Spectroscopy.* NMR spectra for HMF coupled products were recorded on a 300 MHz ( $^1\text{H}$ -NMR: 300 MHz,  $^{13}\text{C}$ -NMR: 75 MHz) Bruker device from BioSpin GmbH at 20 °C.  $^1\text{H}$  NMR spectra for HMF-furfural cross coupled products were recorded on a 500 MHz Bruker Ultrashield Plus device. Chemical shifts are relative to the used solvents (acetone- $d_6$ :  $^1\text{H}$ :  $\delta = 2.09$  ppm,  $^{13}\text{C}$ :  $\delta = 30.6$  ppm ( $\text{CD}_3$ )), indicated in ppm.

*Mass Spectrometry.* EI Mass spectra for coupled furfural products were measured with a "Finnigan SSQ 7000" device. Spectra for HMF-furfural coupled products were recorded using a "Bruker MicrOTOF" ESI-TOF device.

*IR Spectroscopy.* IR spectra were measured with a "Perkin-Elmer 100FT-IR" spectrometer and detected with an "UATR Diamond/KRS-5" device. The measurement was performed as difference spectra versus  $\text{CHCl}_3$ . The unit of the absorption signals is  $\text{cm}^{-1}$ . Signal intensities are characterized by following abbreviations: vs = very strong (0 - 20 %), s = strong (21 - 40 %), m = medium (41 - 60 %), w = weak (61 - 80 %), vw = very weak (81 - 90 %).

### 2-hydroxy-1,2-bis(5-(hydroxymethyl)furan-2-yl)ethanone

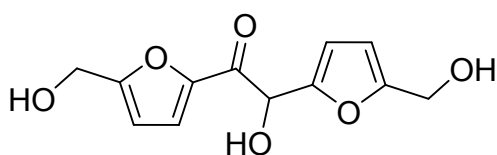

$^1\text{H}$  NMR(acetone- $d_6$ ):  $\delta$  7.42 (d,  $J = 3.6$  Hz, 1 H), 6.54 (d,  $J = 3.5$  Hz, 1 H), 6.42 (d,  $J = 3.1$  Hz, 1 H), 6.27 (d,  $J = 3.2$  Hz, 1 H), 5.84 (d,  $J = 6.8$  Hz, 1 H), 4.67 – 4.62 (m, 3 H), 4.49 (d,  $J = 5.9$  Hz, 1 H), 4.26 (t,  $J = 6.0$  Hz, 1 H) ppm.

$^{13}\text{C}$  NMR (acetone- $d_6$ ):  $\delta$  185.9, 163.1, 157.7, 153.6, 150.7, 122.8, 111.0, 110.8, 109.5, 71.3, 58.3, 58.0 ppm;

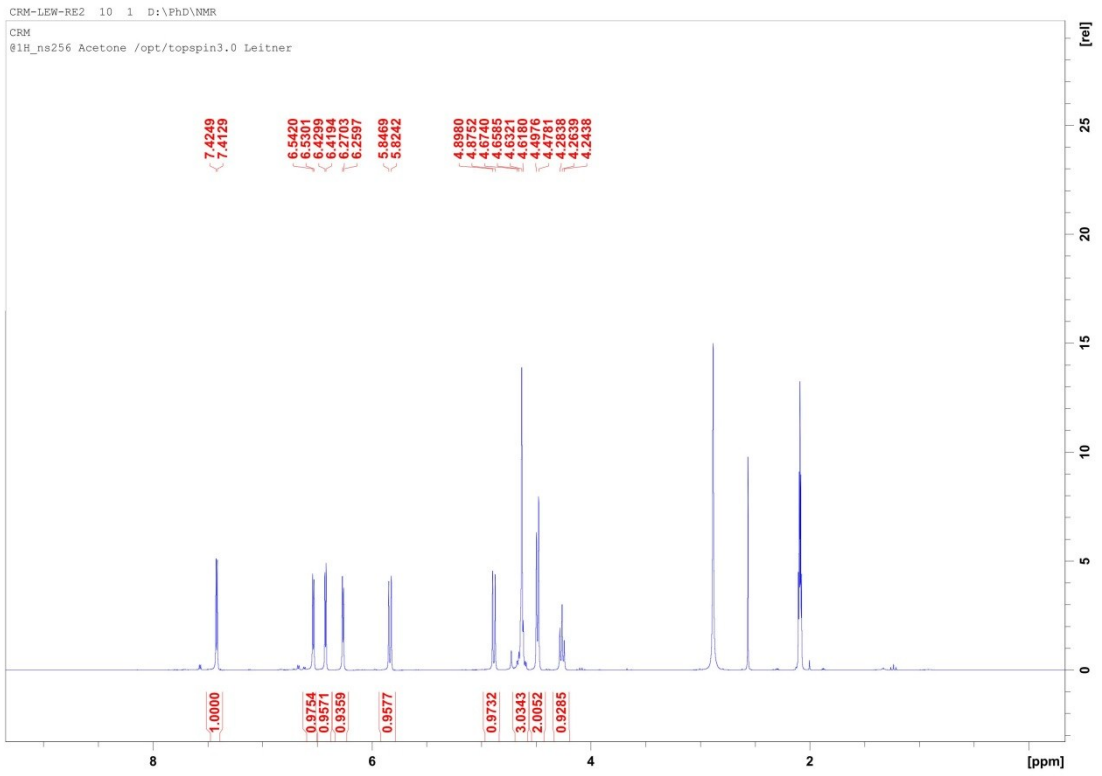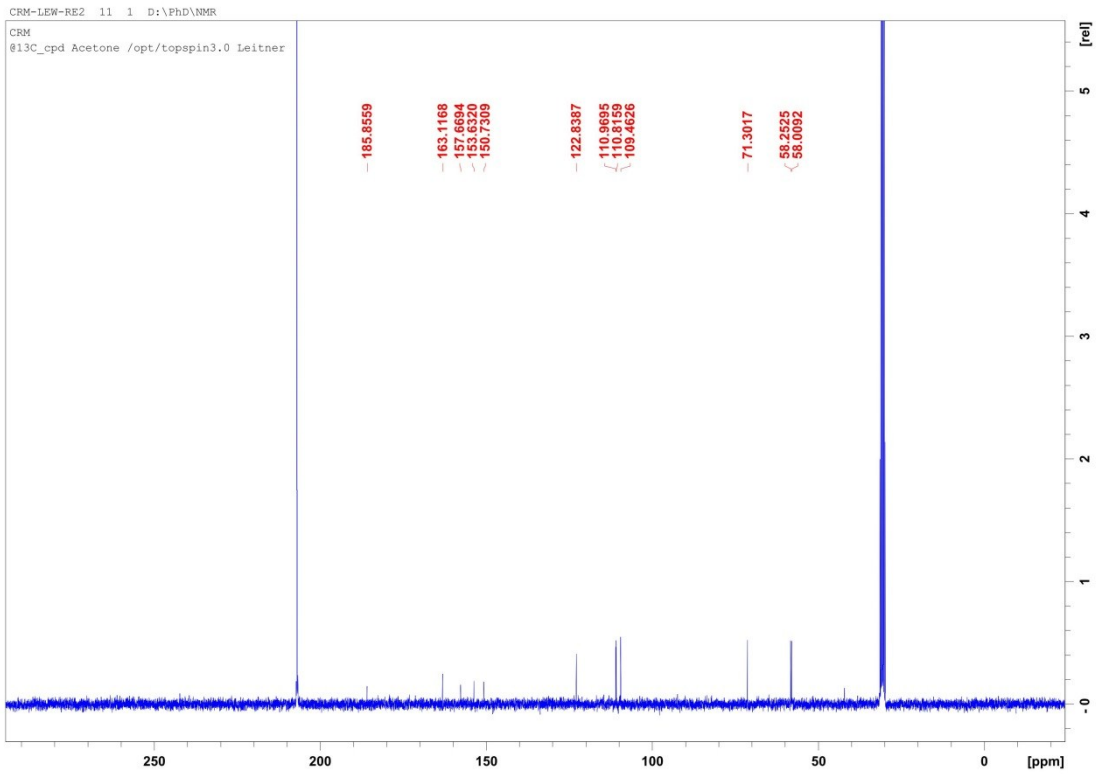

**1,2-bis(5-(hydroxymethyl)furan-2-yl)ethane-1,2-dione**

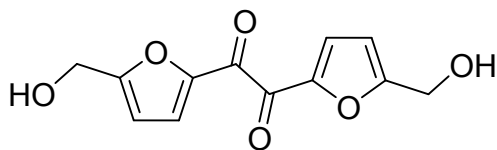

**<sup>1</sup>H NMR(acetone-*d*<sub>6</sub>):**  $\delta$  7.57 (d,  $J$  = 3.6 Hz, 2 H), 6.67 (d,  $J$  = 3.6 Hz, 2 H), 4.73 (m, 6 H) ppm;

**<sup>13</sup>C NMR (acetone-*d*<sub>6</sub>):**  $\delta$  179.3, 165.4, 150.4, 127.0, 111.5, 58.4 ppm;

**IR (KBr):**  $\nu$  = 3249 (s), 3120 (m), 2942 (vw), 2104 (vw), 1739 (m), 1633 (vs), 1497 (vs), 1437 (m), 1387 (m), 1339 (w), 1273 (m), 1231 (w), 1190 (s), 1019 (vs), 949 (vs), 822 (vs), 781 (vs), 685 (w) cm<sup>-1</sup>;

**MS (EI, 100 eV):**  $m/z$  (%) = 250 ([M]<sup>+</sup>, 15), 233 (43), 125 ([C<sub>6</sub>H<sub>5</sub>O<sub>3</sub>]<sup>+</sup>, 100), 69 (19), 52 (18), 51 (23), 50 (20).

**HRMS (ESI):** [M]<sup>+</sup>+Na<sup>+</sup> calculated for [C<sub>12</sub>H<sub>10</sub>O<sub>6</sub>Na]<sup>+</sup>: 273.03696, found: 273.03699.

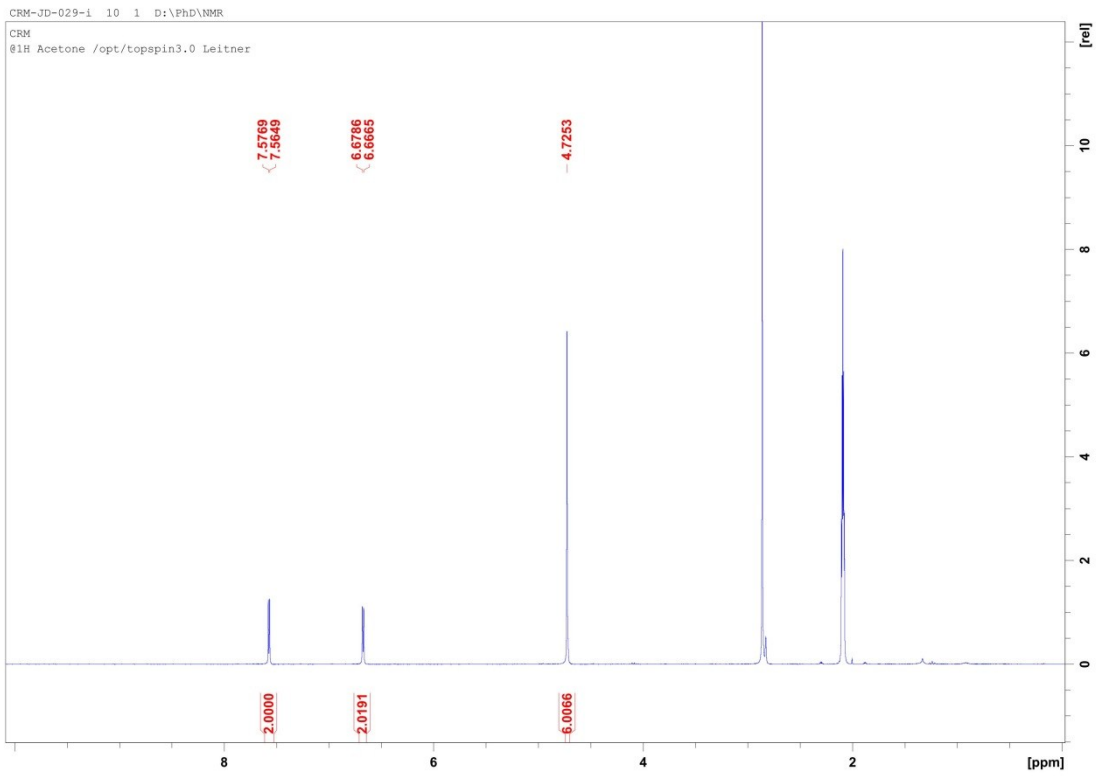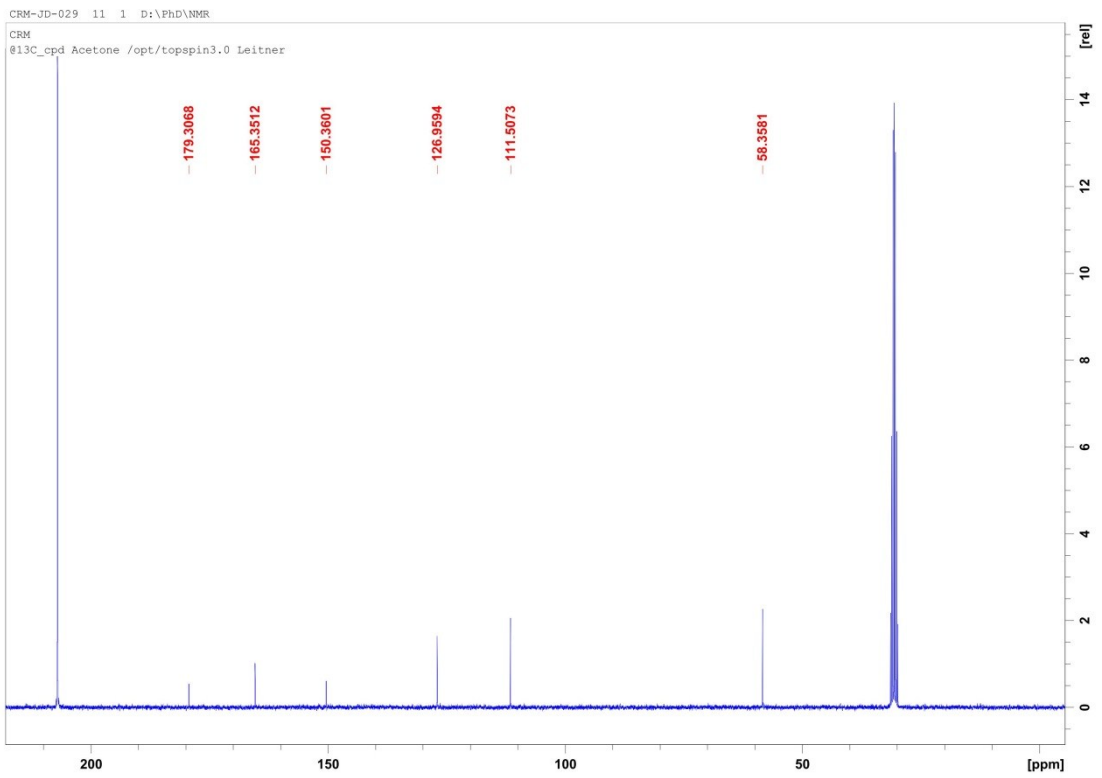

$^1\text{H}$  NMR spectra for coupling reactions with HMF/Furfural substrate ratios of 100/0 (green), 0/100 (red) and 50/50 (blue)

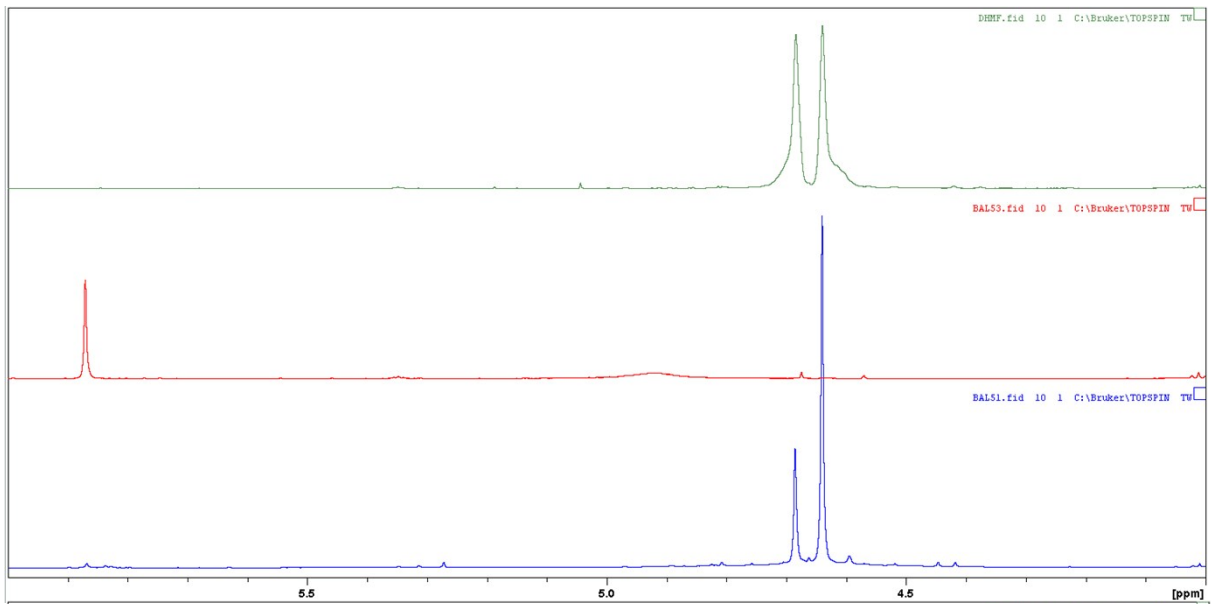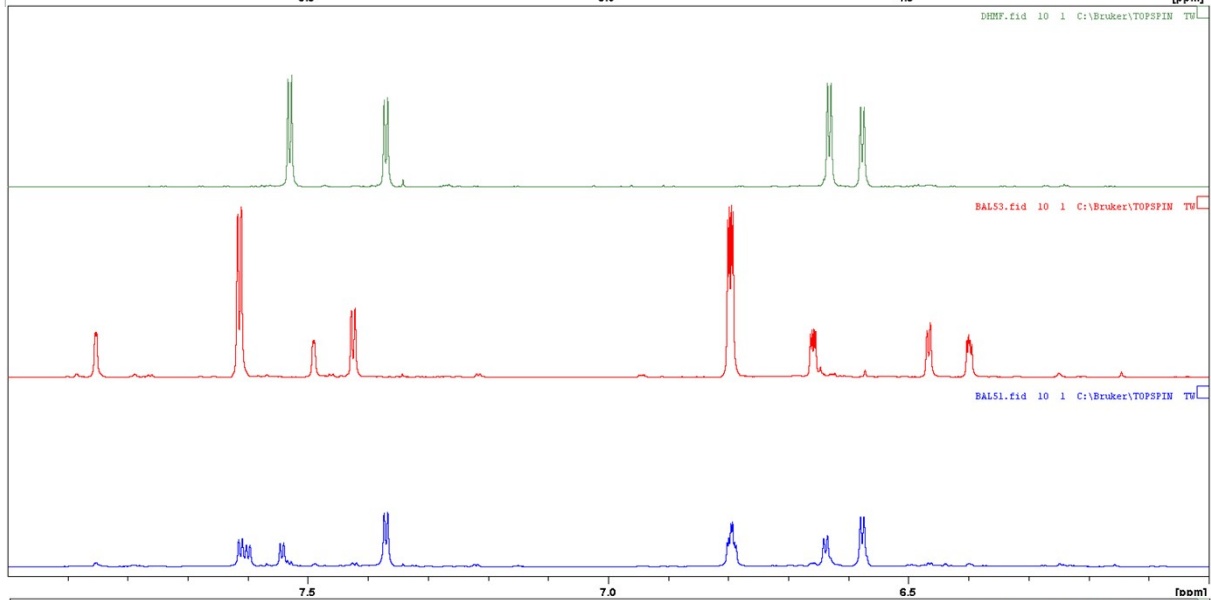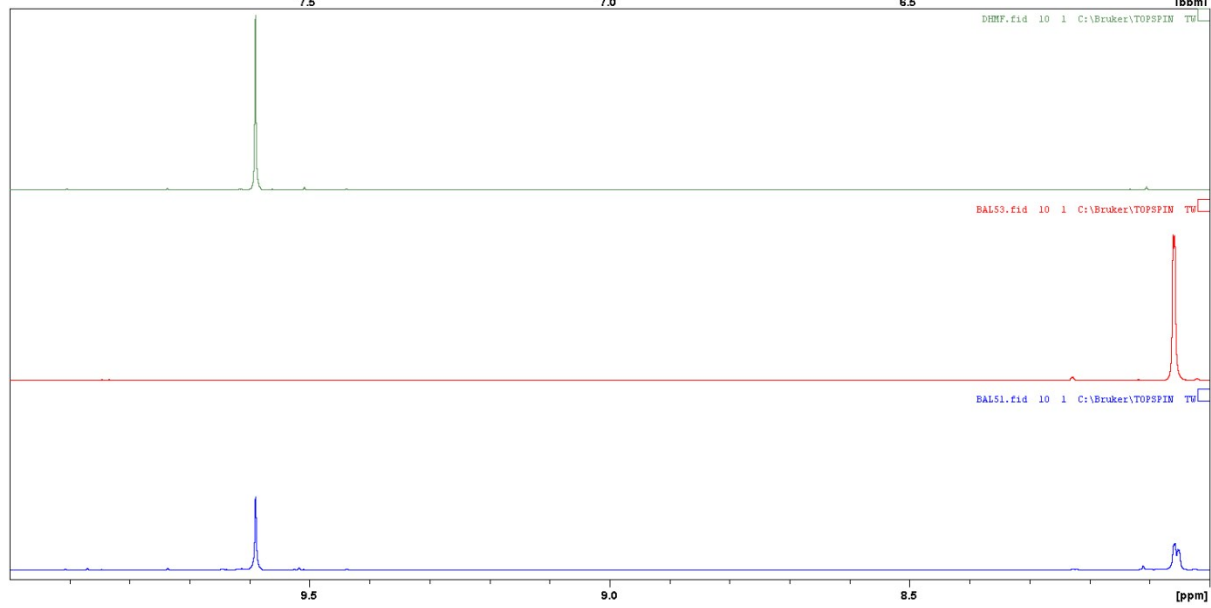

Conversions were calculated by identification of product peaks through comparison to substrate spectra and spectra of isolated coupled HMF products. Subsequent integration of relevant peaks yielded relative quantities of each product.

**1-(furan-2-yl)-2-(5-(hydroxymethyl)furan-2-yl)ethane-1,2-dione**

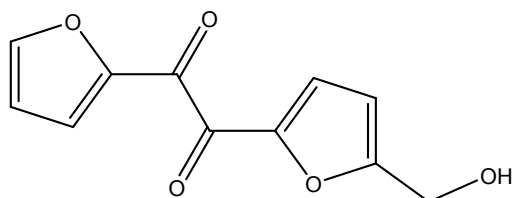

$^1\text{H}$  NMR (500 MHz, acetone- $d_6$ ): 4.68 ((br)s, 2H) 6.64 (dt,  $J$ = 3.7, 0.7 Hz, 1H) 6.79 (dd,  $J$ = 3.6, 1.7 Hz, 1H) 7.55 (dt,  $J$ = 3.6, 0.4 Hz, 1H) 7.60 (dd, 3.7, 0.7 Hz, 1H) 8.05 (dd,  $J$ = 1.7, 0.8 Hz, 1H)

**HRMS (ESI):**  $[\text{M}] + \text{Na}^+$  calculated for  $[\text{C}_{11}\text{H}_8\text{O}_5\text{Na}]^+$ : 243.0298, found: 243.0255.

**1-(furan-2-yl)-2-hydroxy-2-(5-(hydroxymethyl)furan-2-yl)ethanone**

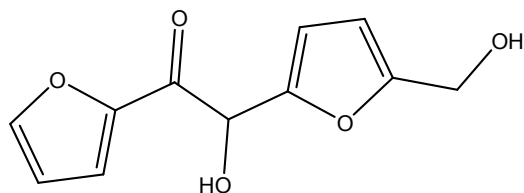

**HRMS (ESI):**  $[\text{M}] + \text{Na}^+$  calculated for  $[\text{C}_{11}\text{H}_{10}\text{O}_5\text{Na}]^+$ : 245.0398, found: 245.0407.



### 1,2-di(furan-2-yl)-2-hydroxyethanone

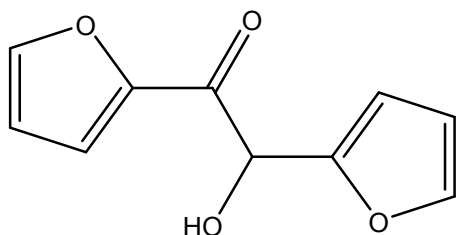

$^1\text{H NMR}$  (500 MHz, acetone- $d_6$ ): 5.87 (s, 1H) 6.40 (ddd,  $J= 3.3, 1.8, 0.3$  Hz, 1H) 6.47 (ddd,  $J= 3.3, 0.8, 0.4$  Hz, 1H) 6.66 (dd,  $J=3.6, 1.7$  Hz, 1H) 7.43 (dd,  $J= 3.6, 0.7$  Hz, 1H) 7.49 (dd,  $J= 1.8, 0.8$  Hz, 1H) 7.85 (dd,  $J= 1.7, 0.7$  Hz, 1H)

**HRMS (ESI):**  $[\text{M}]+\text{Na}^+$  calculated for  $[\text{C}_{10}\text{H}_8\text{O}_4\text{Na}]^+$ : 215.0298, found: 215.0278.

### 1,2-di(furan-2-yl)ethane-1,2-dione

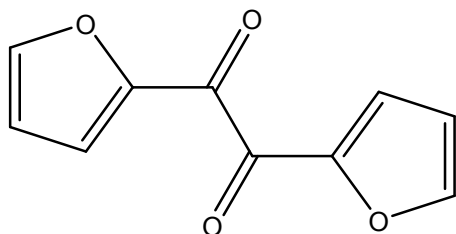

$^1\text{H NMR}$  (500 MHz, acetone- $d_6$ ): 6.80 (dd,  $J= 3.7, 1.7$  Hz, 2H) 7.62 (dd,  $J= 3.7, 0.7$  Hz, 2H) 8.06 (dd,  $J= 1.7, 0.7$  Hz, 2H)

**HRMS (ESI):**  $[\text{M}]+\text{Na}^+$  calculated for  $[\text{C}_{10}\text{H}_6\text{O}_4\text{Na}]^+$ : 213.0198, found:213.0161.
